# Supplementary material
Source: PubMed Central journal article supplement (PMC5686748)

## **SUPPLEMENTARY FIGURE LEGENDS**

**FIG S1.** Amino acid conservation amongst different DENV serotypes and related flaviviruses. The amino acid sequences of representative flavivirus isolates for DENV serotypes 1-4, WNV, YFV and JEV were aligned and compared using JalView software and the *ClustalW* algorithm, using default settings (see Materials and Methods for accession numbers). Residues are color-coded according to the *ClustalW* algorithm. As generated by JalView, ‘Conservation’ provides a graphical and numerical indication of the number of conserved physico-chemical properties of residues at each position. ‘Quality’ provides a measure of the likelihood of observing mutations at a given position. ‘Consensus’ depicts the percentage of the modal residue for each position. The location of the 25 top-ranked tolerated insertion sites (P2 / P0) are highlighted in yellow.

## **SUPPLEMENTARY MOVIE LEGENDS**

**Movie S1.** Live cell imaging of NS1-mScarlet localization and traffic. Huh-7.5 cells were transfected with DENV2-NS1-mScarlet RNA transcripts and cultured for 6 days prior to live cell imaging. Images were acquired every 1.5 s for 5 minutes. To enhance the visibility of weakly fluorescent structures the ‘Yellow Fire’ lookup table and scaling was applied according to the lookup tables displayed in the upper-right corner of each panel using NIS Elements v.3.22 software (Nikon). The ‘time stamp’ is displayed in the upper-left corner of each panel. Playback speed is 5 frames/s (~8× original speed). Scale bars are 10 μm for the main image (top panel) and 5 μm for ‘Insets’ (bottom panels).

**Movie S2.** Intense juxta-nuclear NS1-mScarlet foci are relatively static over extended periods (~50 mins). Huh-7.5 cells were infected with DENV2-NS1-mScarlet (M.O.I. ~0.01) for 3 d before live cell imaging. Images were acquired every 10 s for 50 minutes. To enhance the

visibility of weakly fluorescent structures the 'Yellow Fire' lookup table and scaling was applied according to the lookup table displayed in the upper-right corner using NIS Elements v.3.22 software (Nikon). The 'time stamp' is displayed in the upper-left corner. Playback speed is 5 frames/s (~50× original speed). The scale bars represents 10  $\mu\text{m}$ .

**Fig. S1**

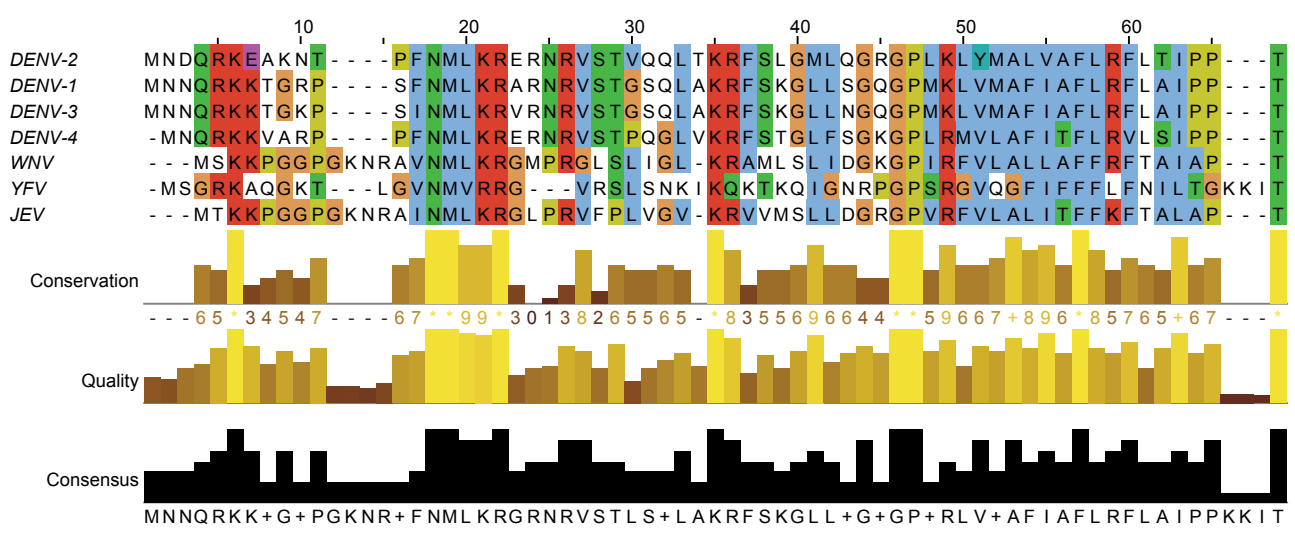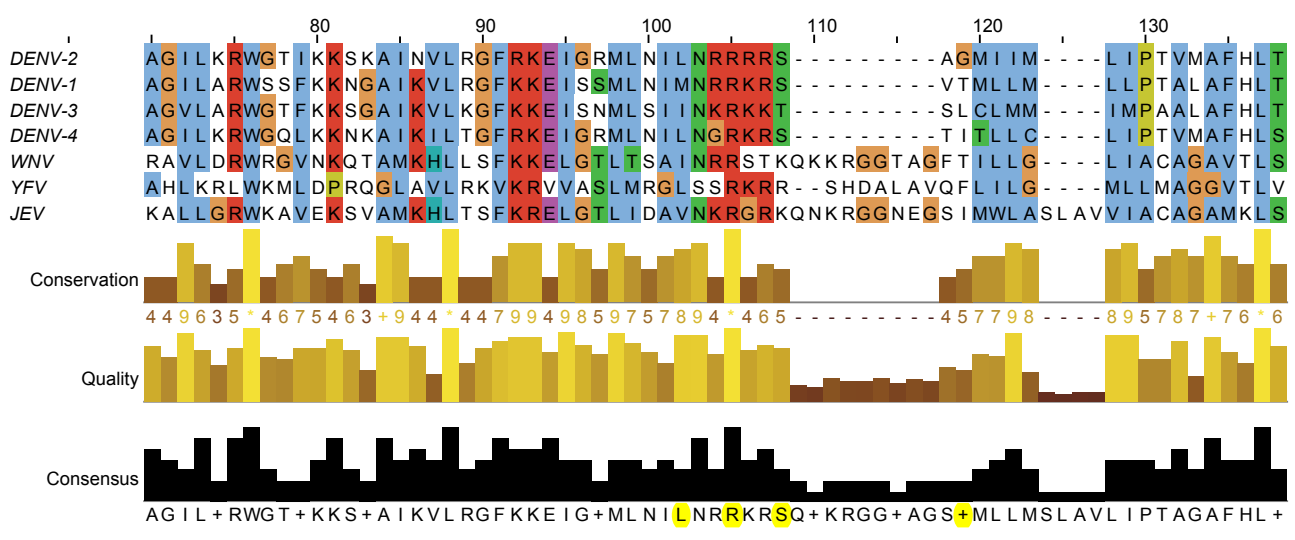

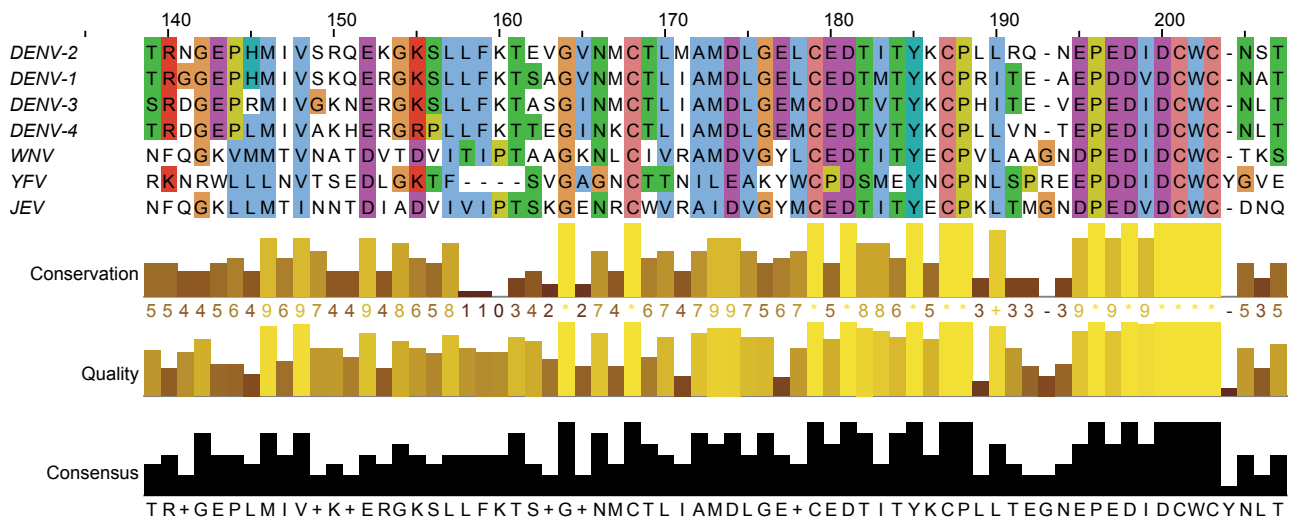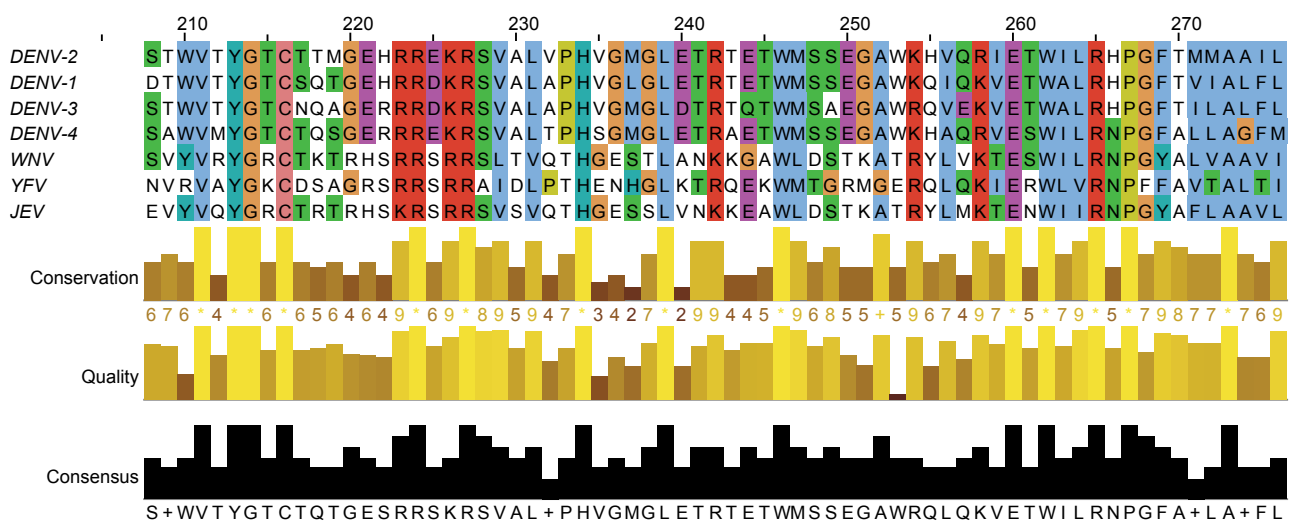



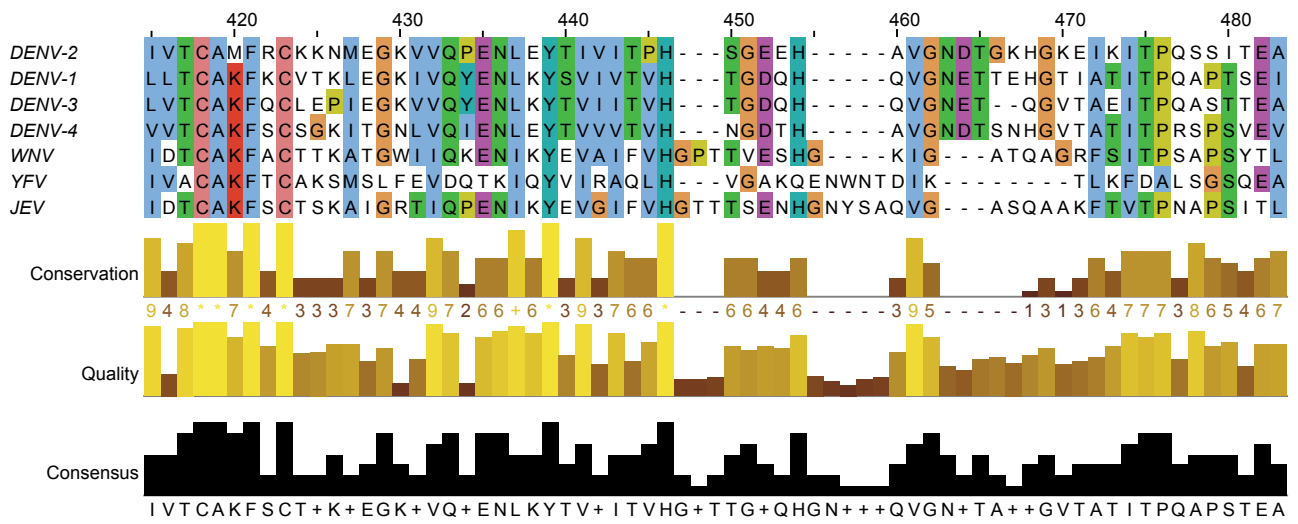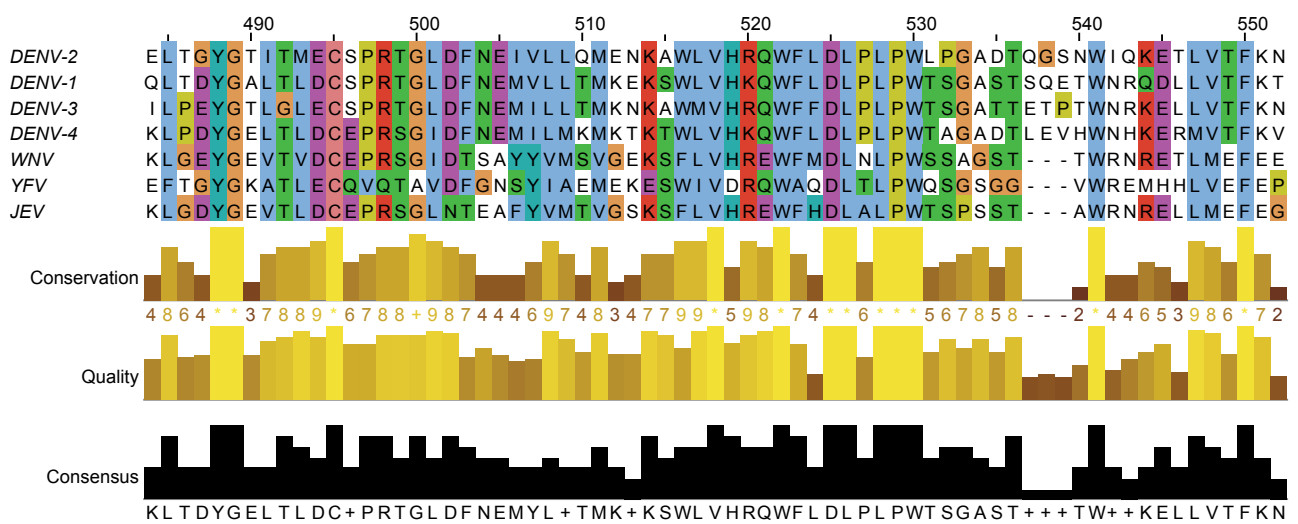

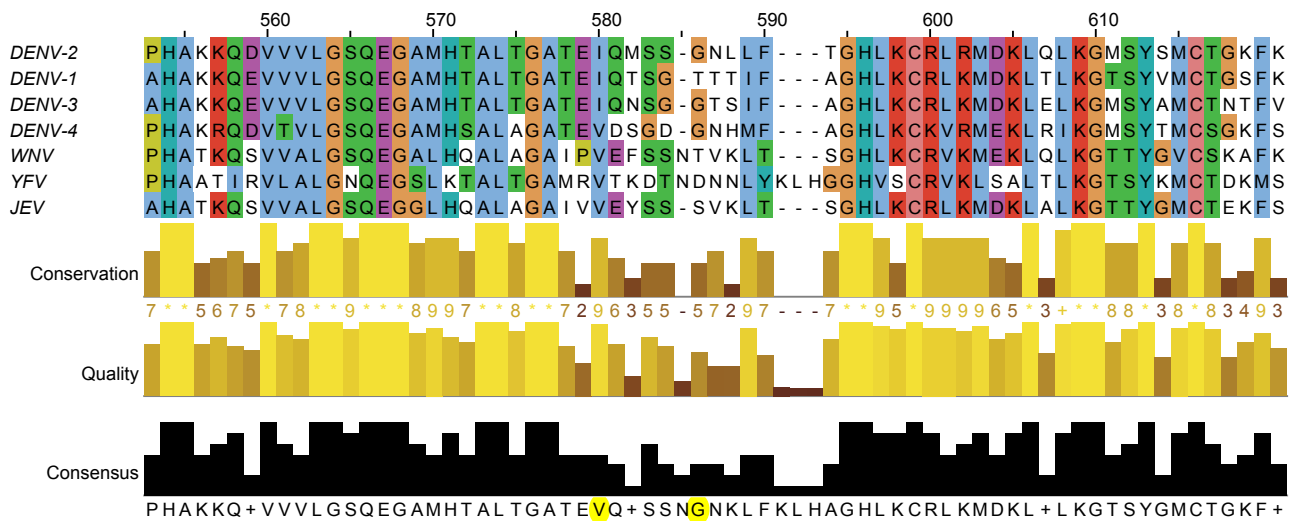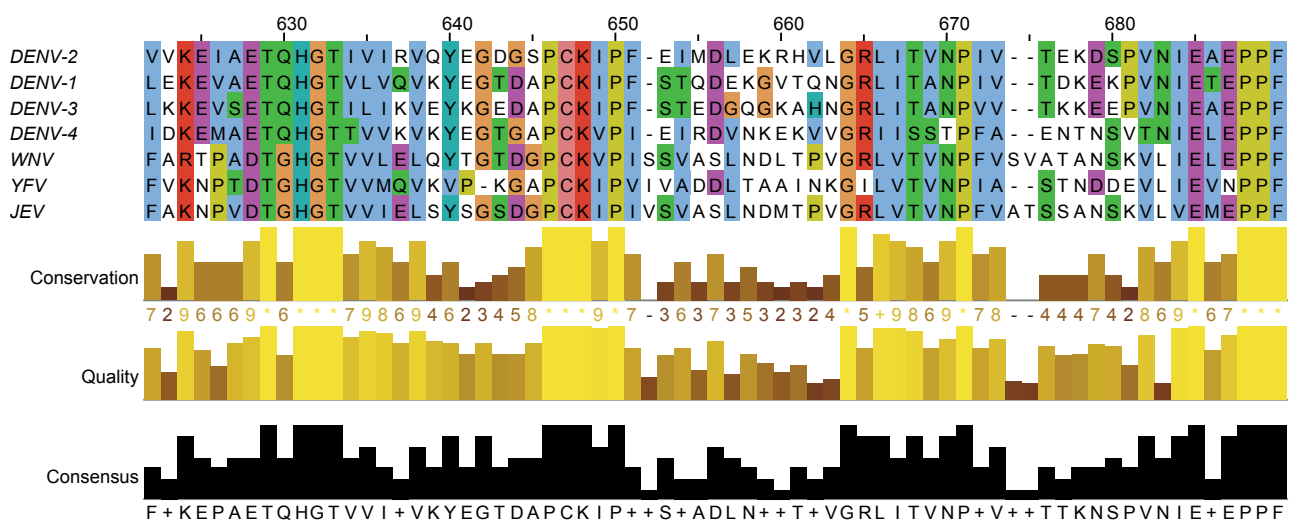

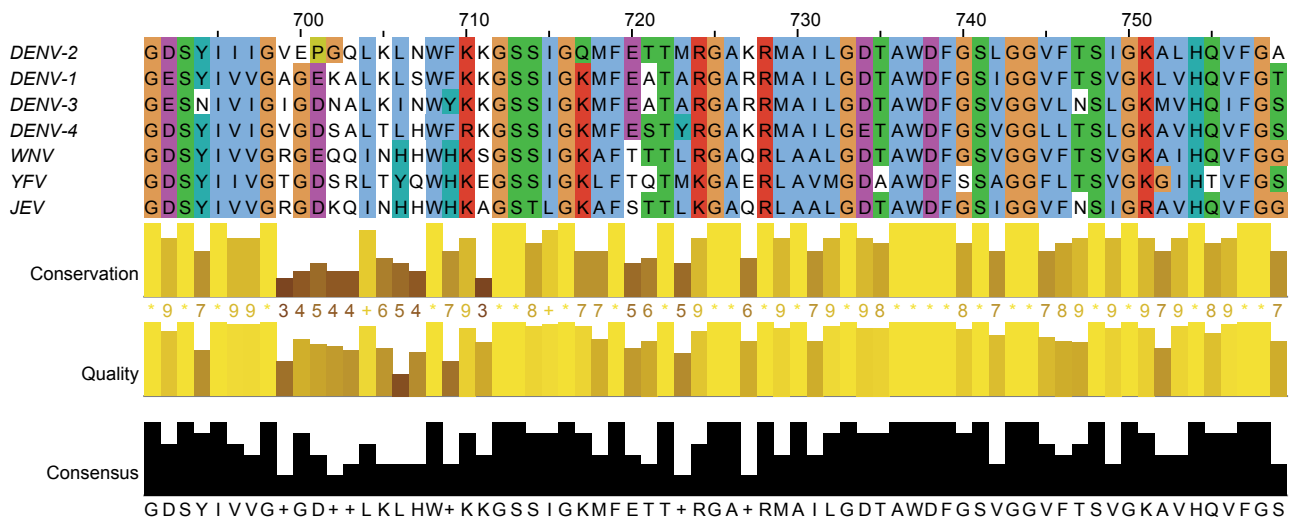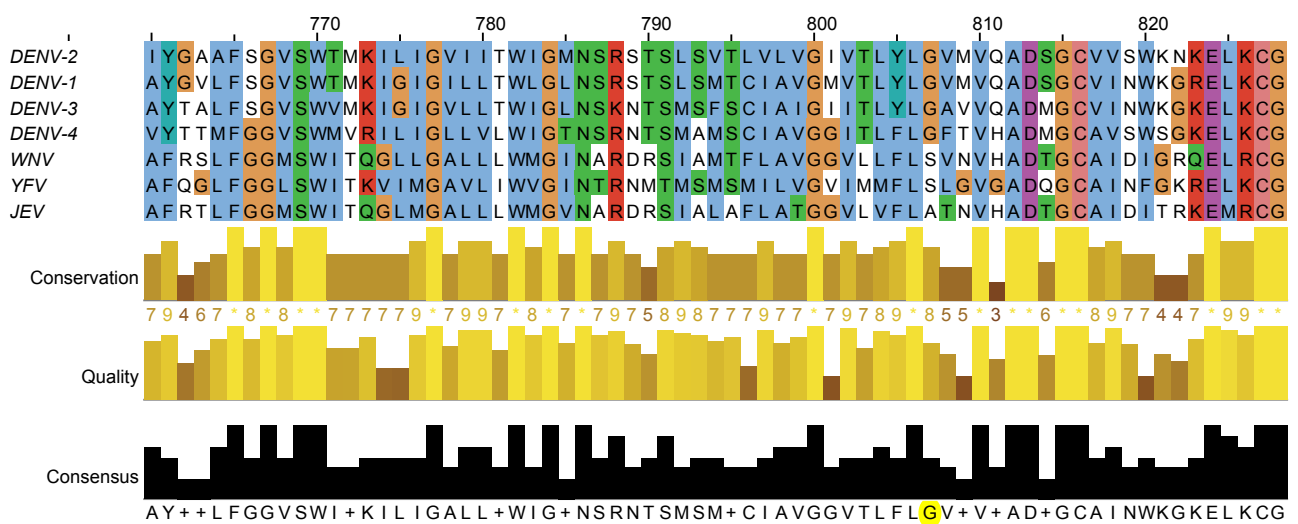



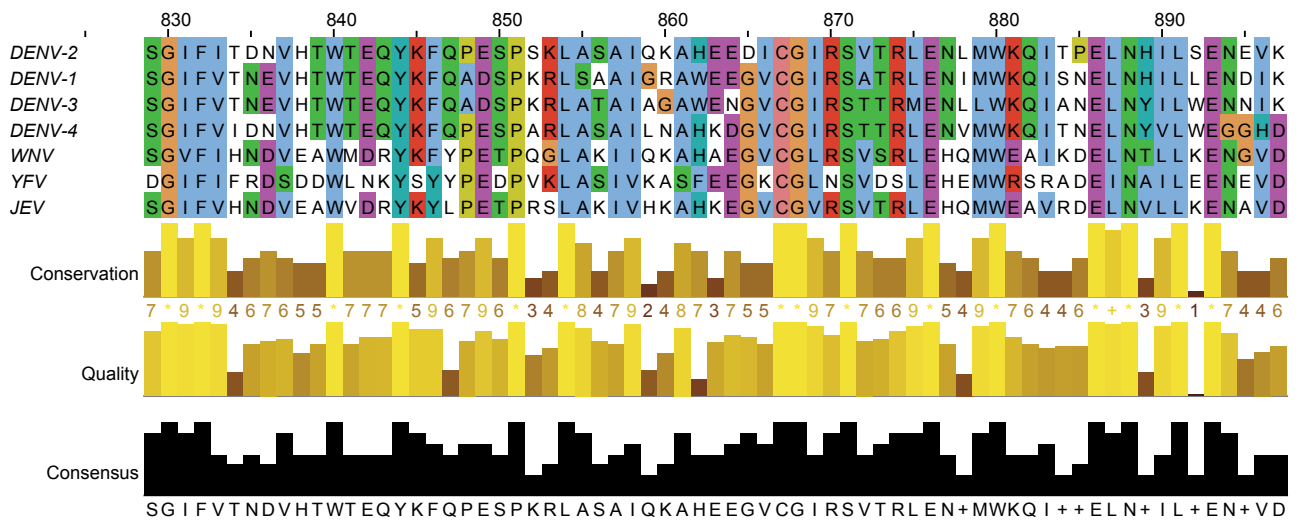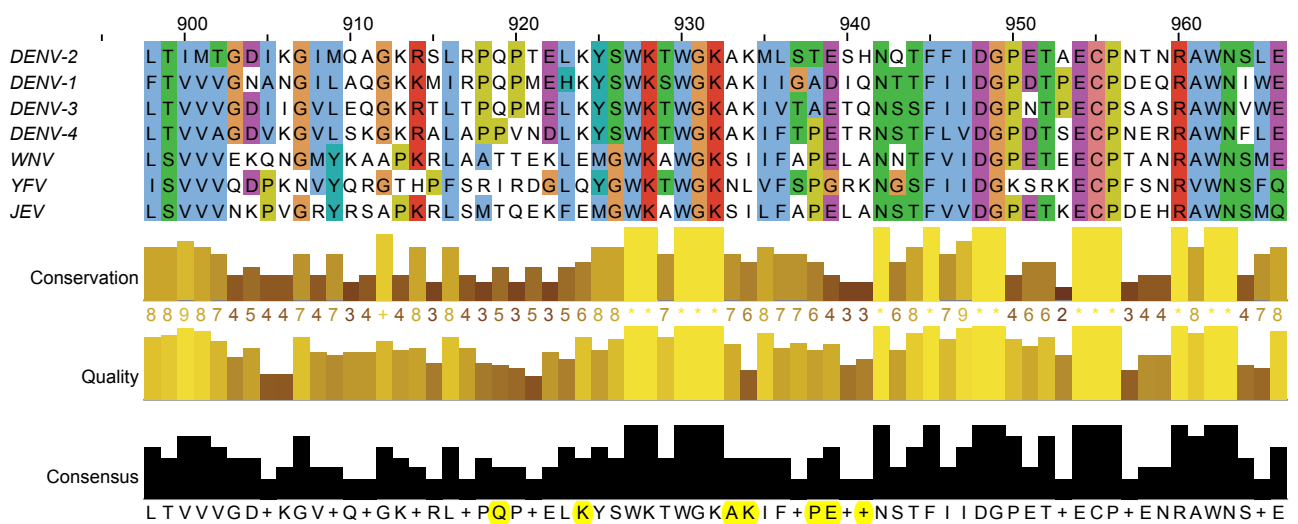

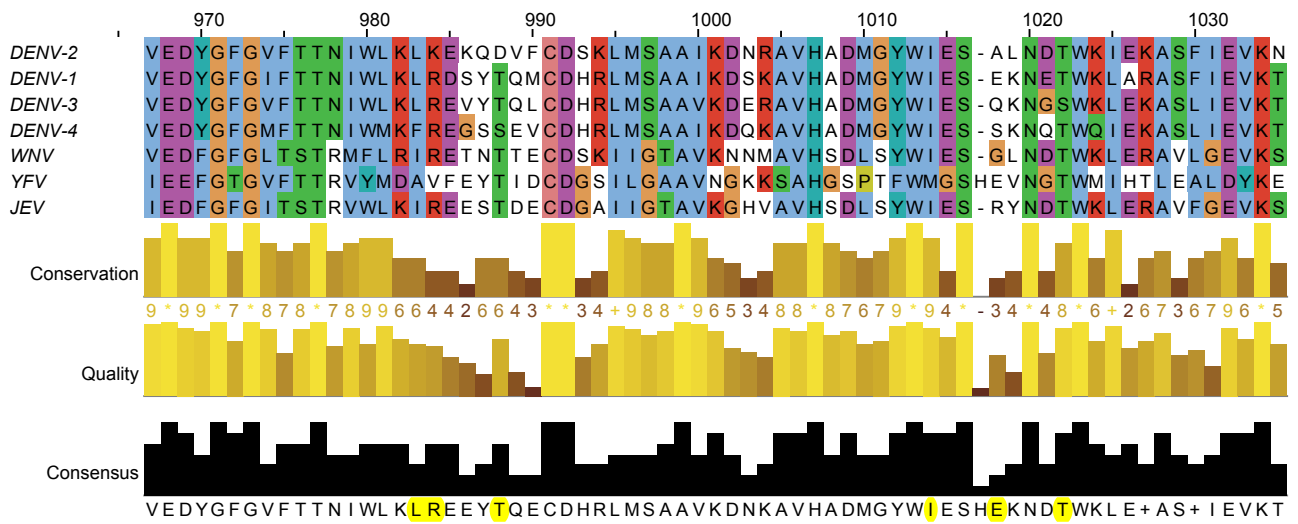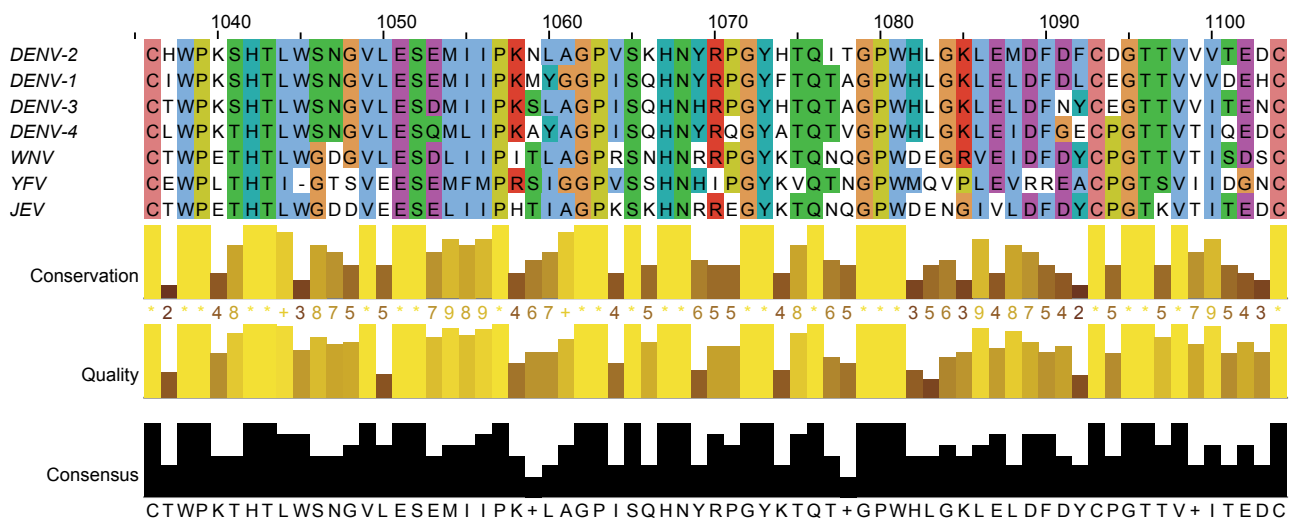

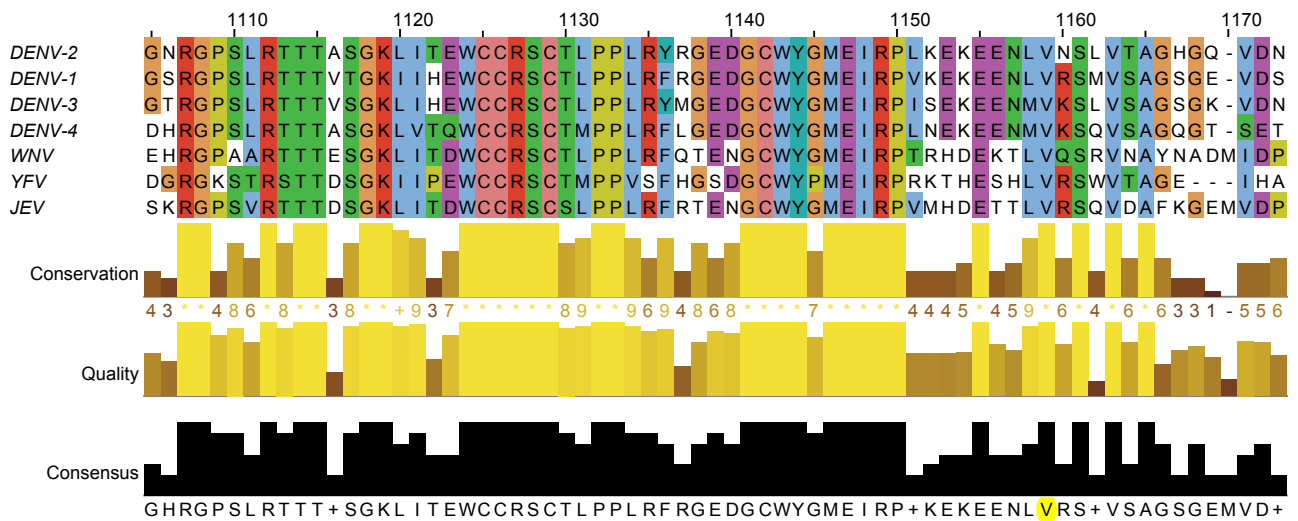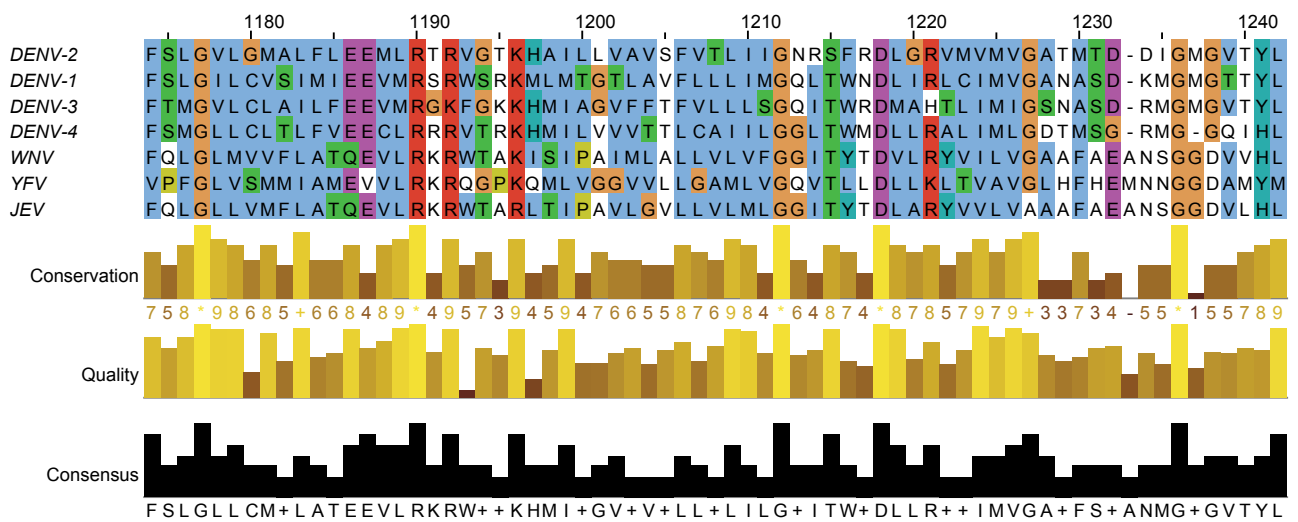

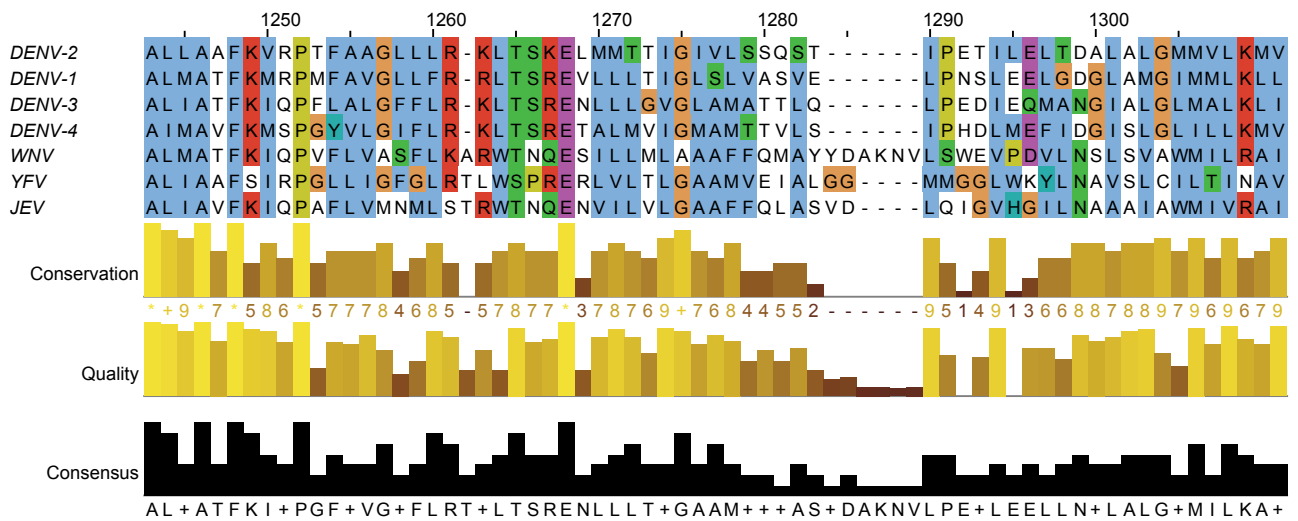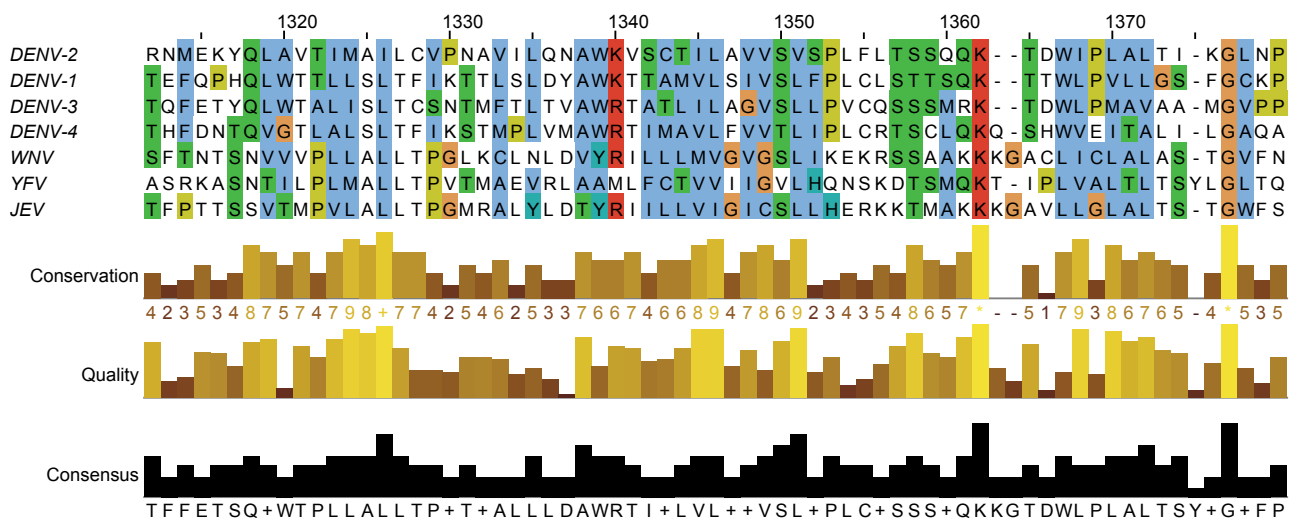

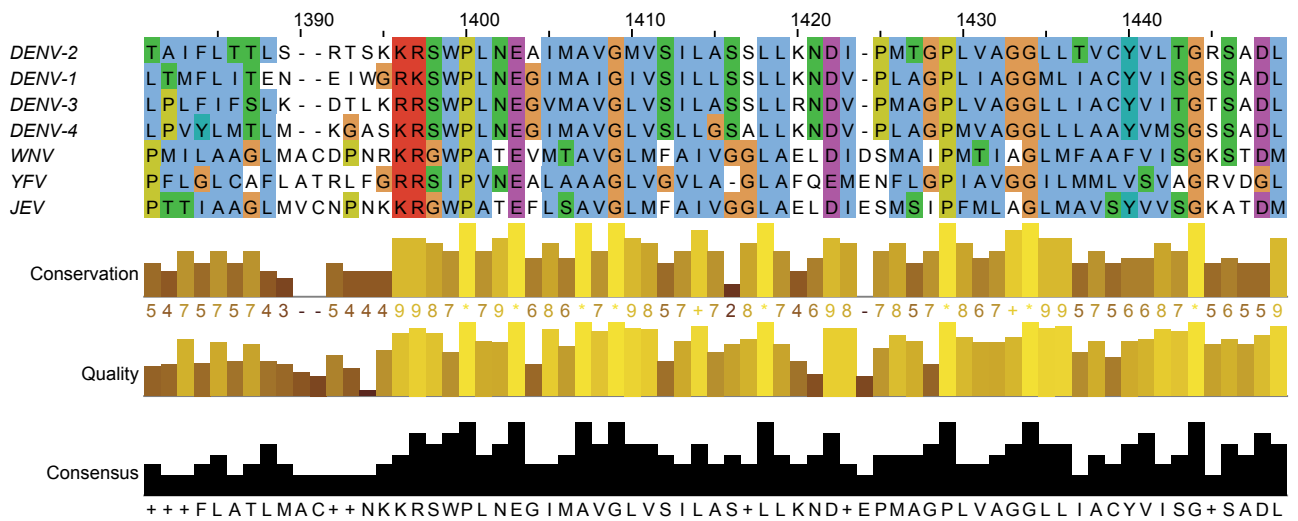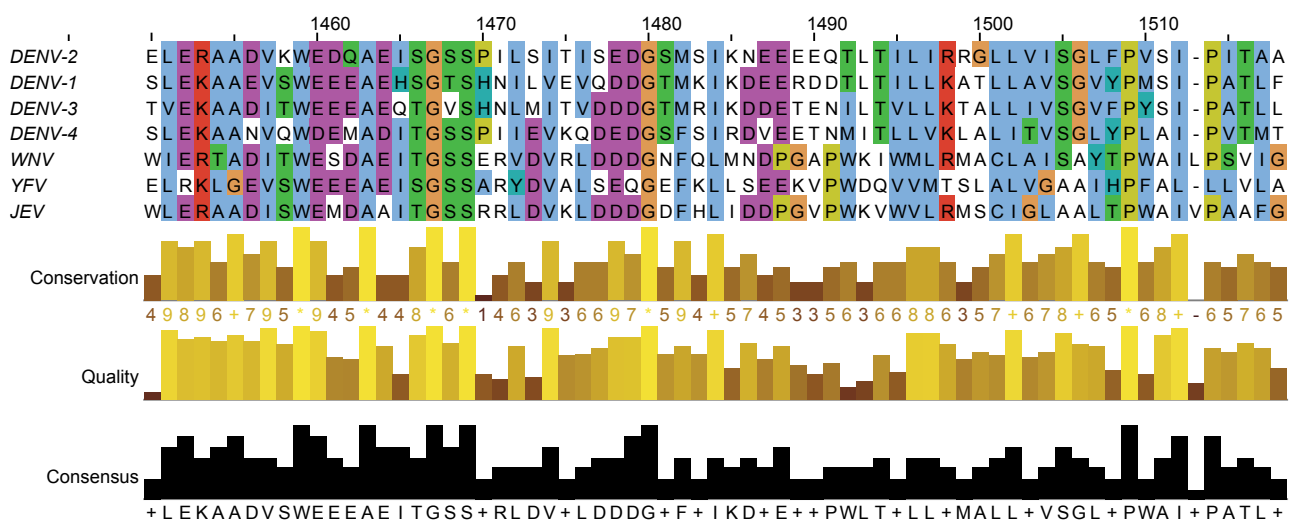

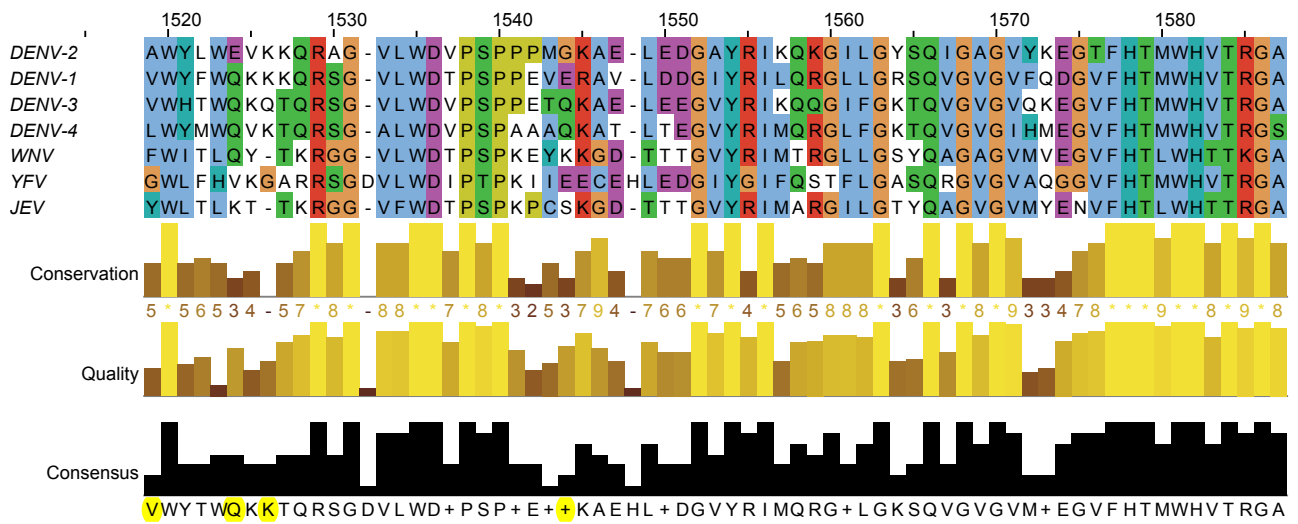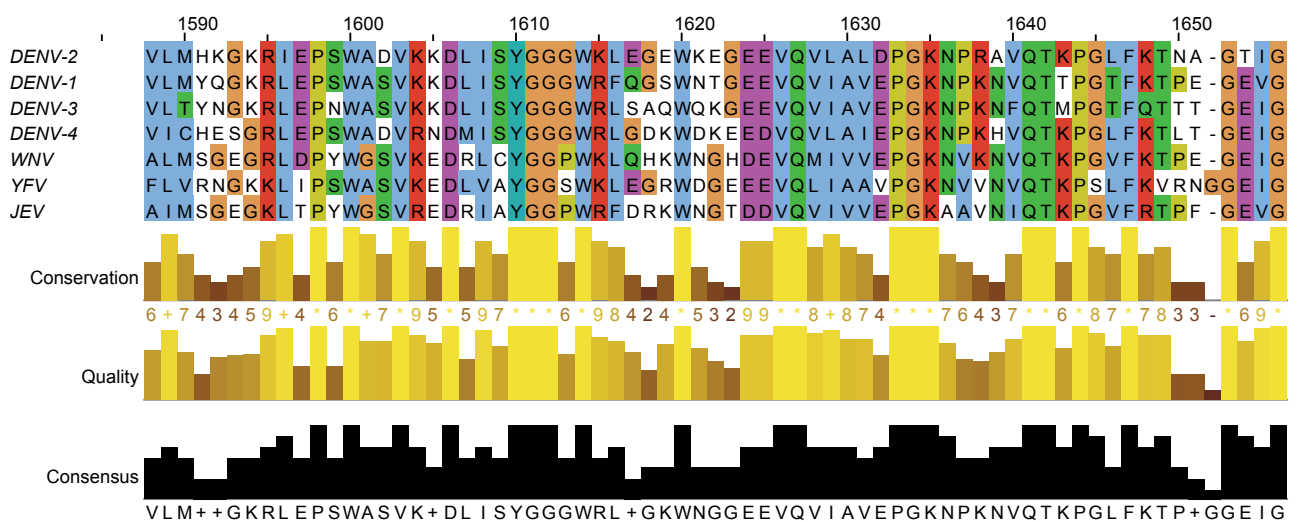

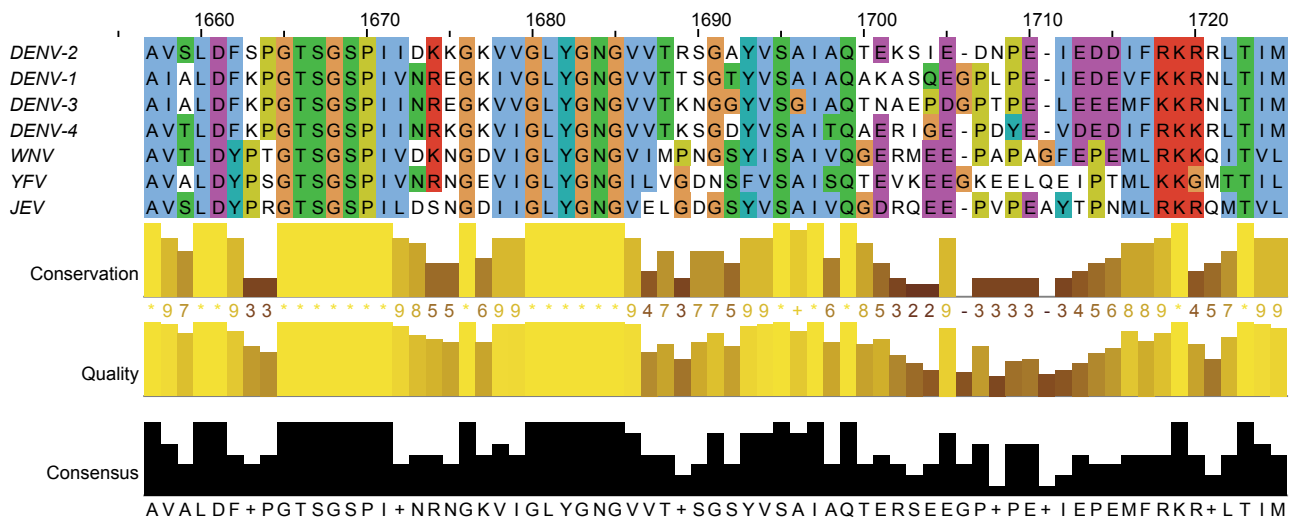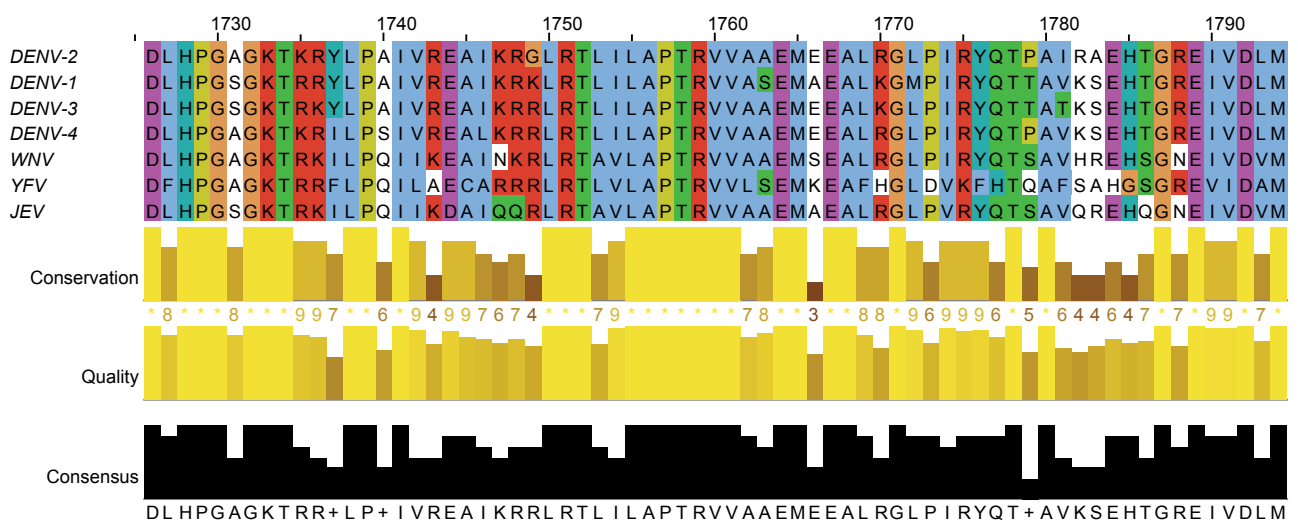

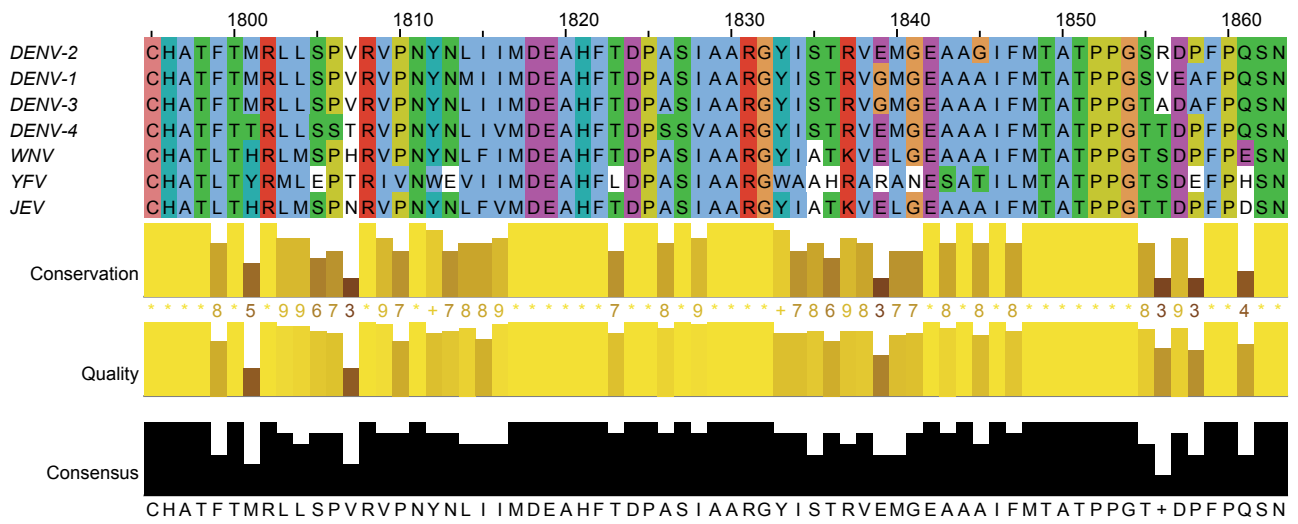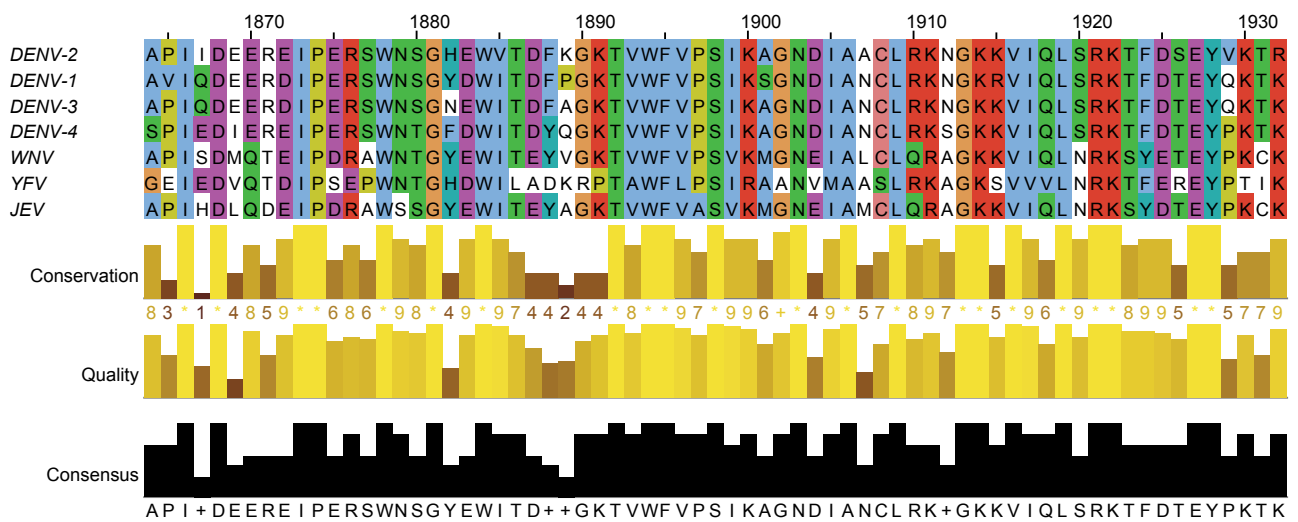



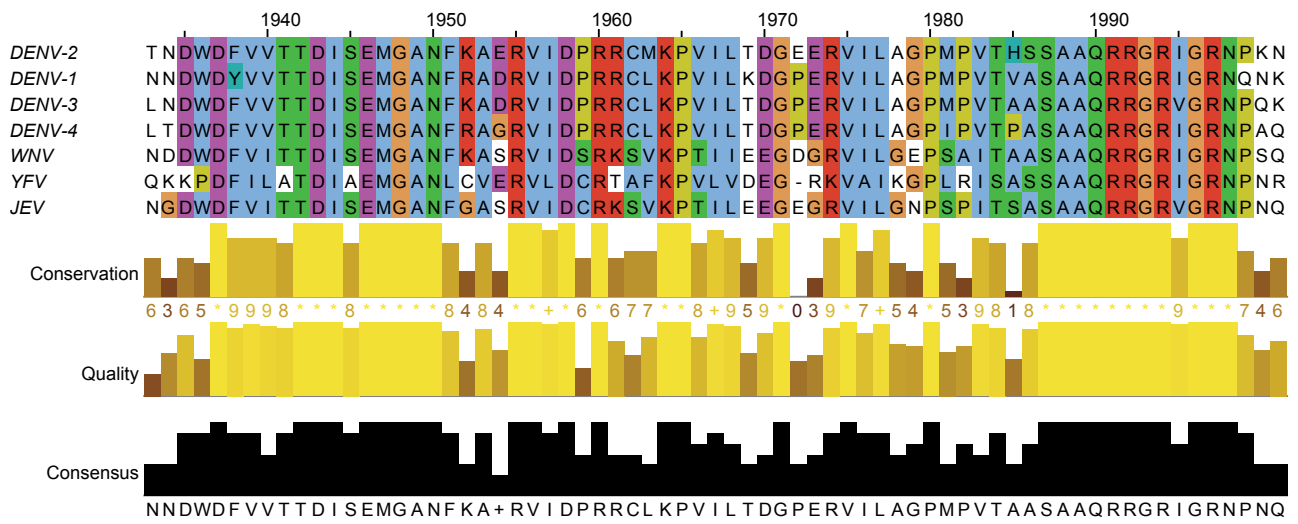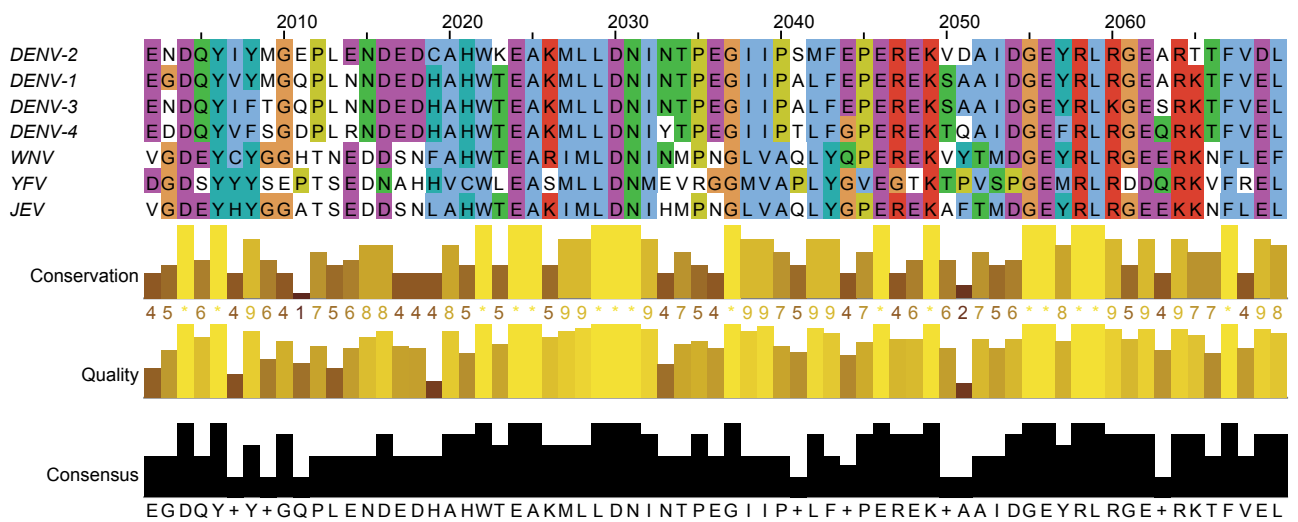

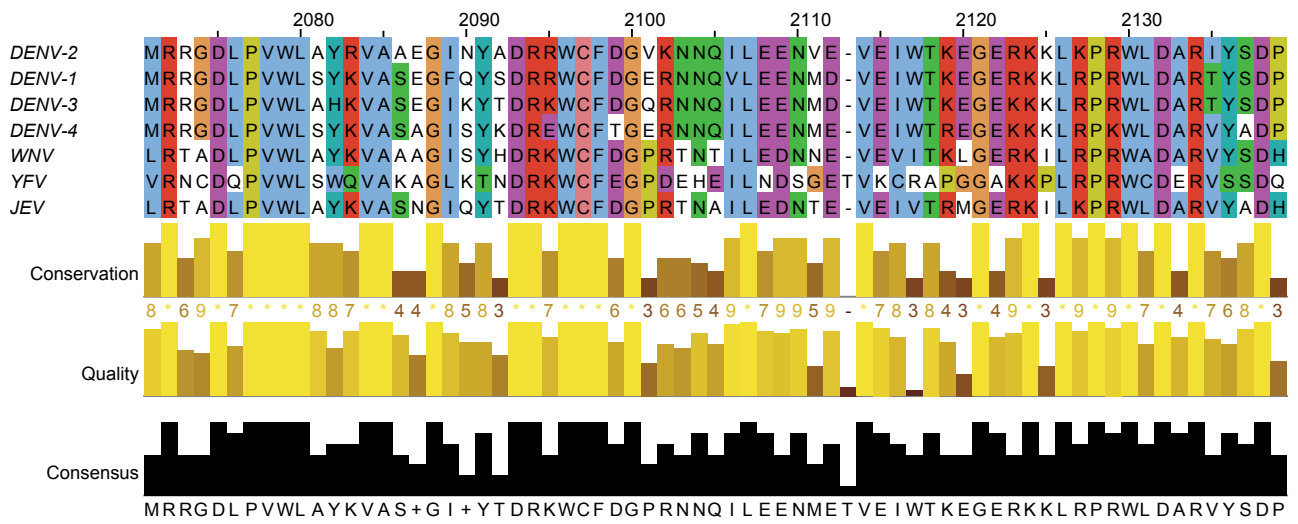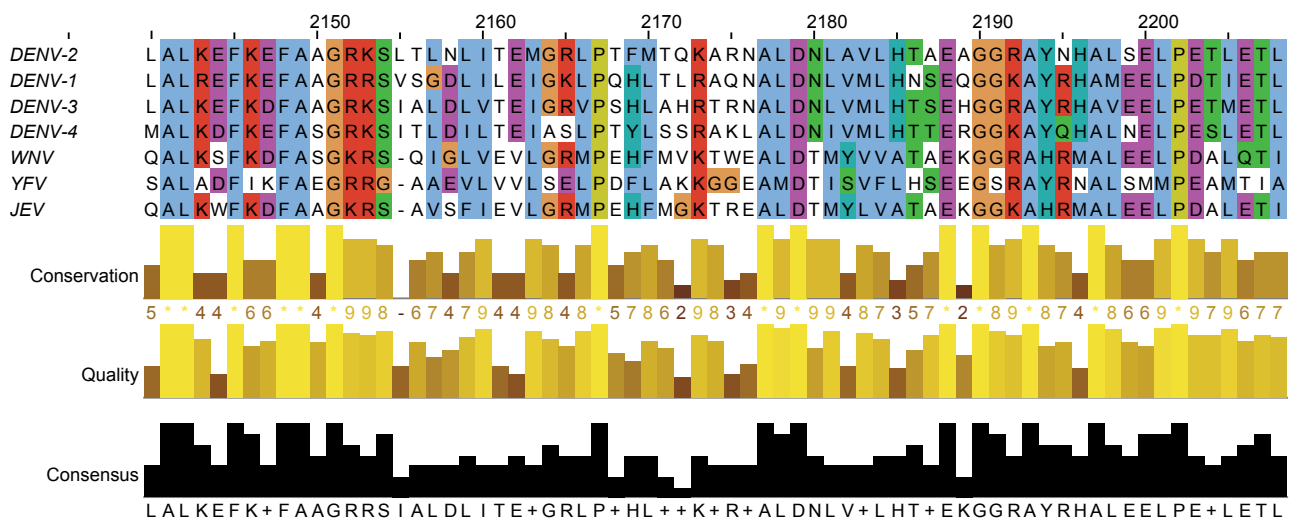

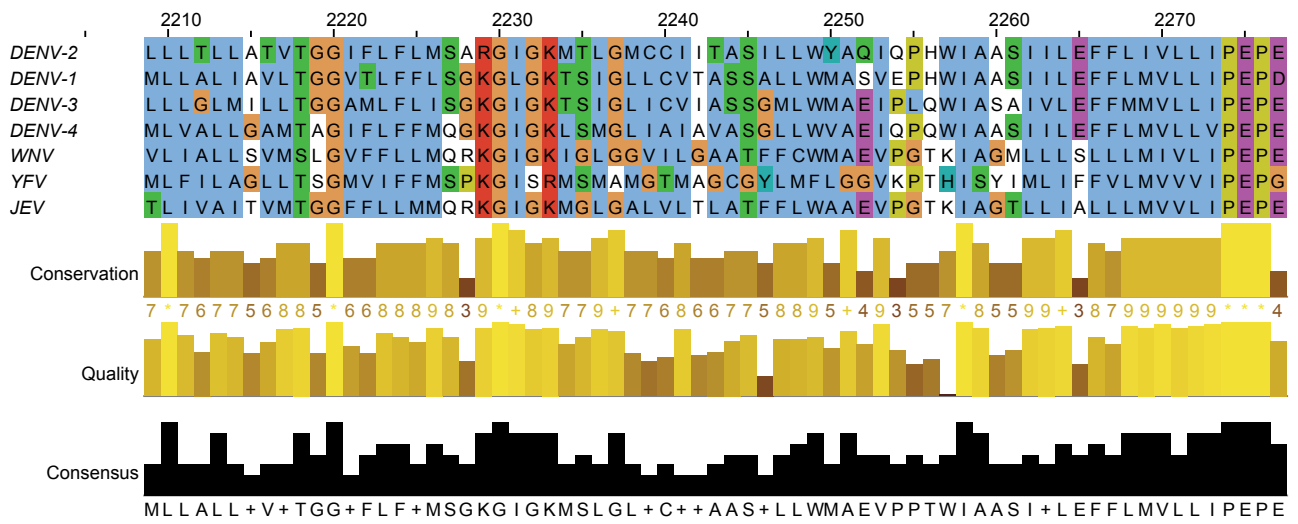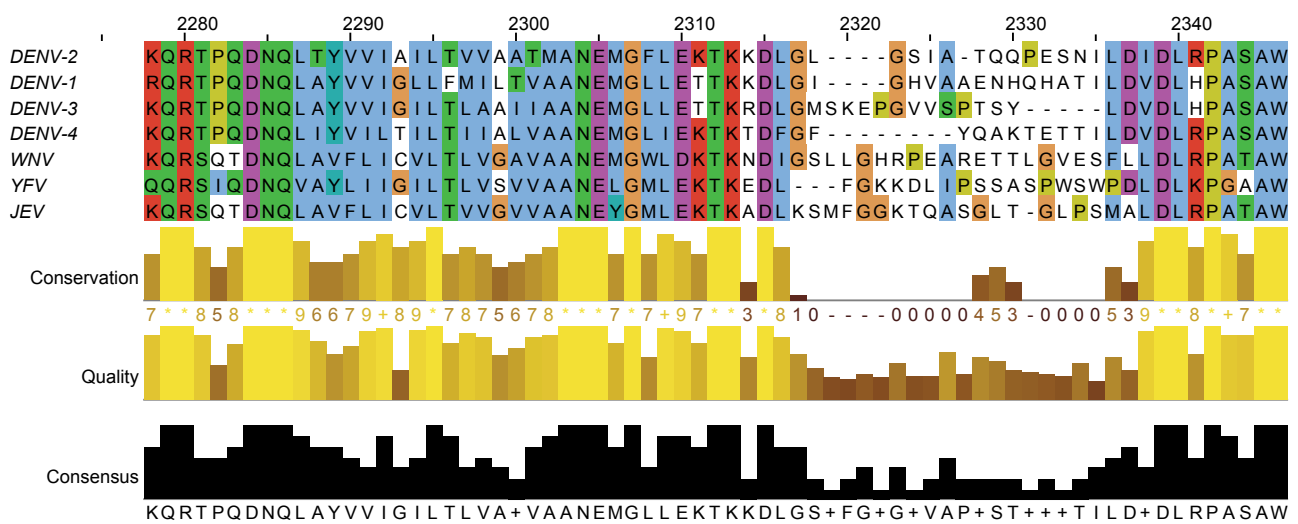

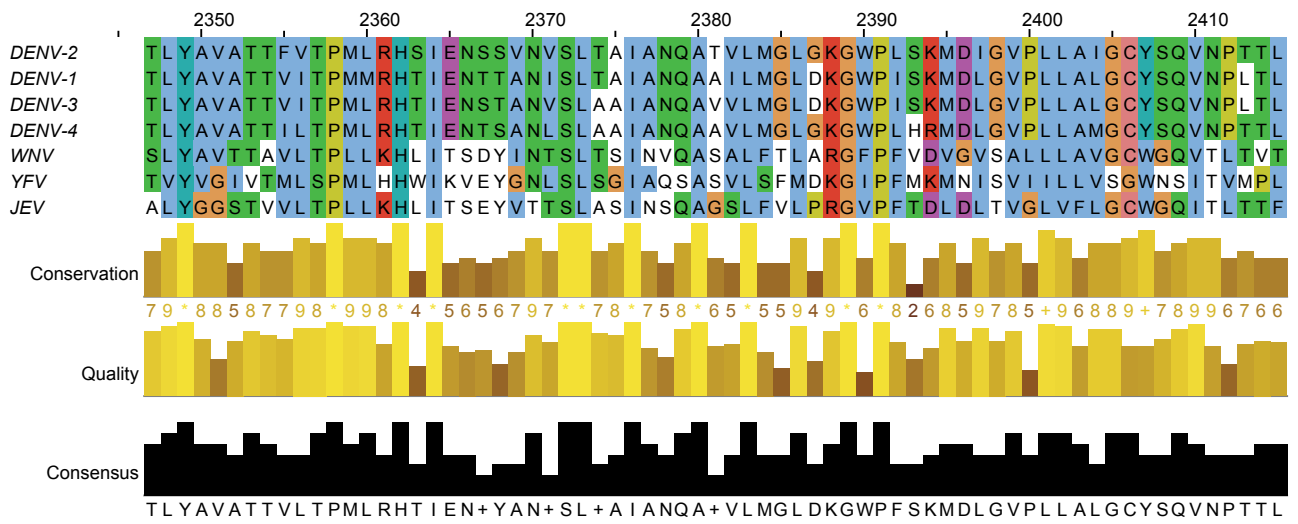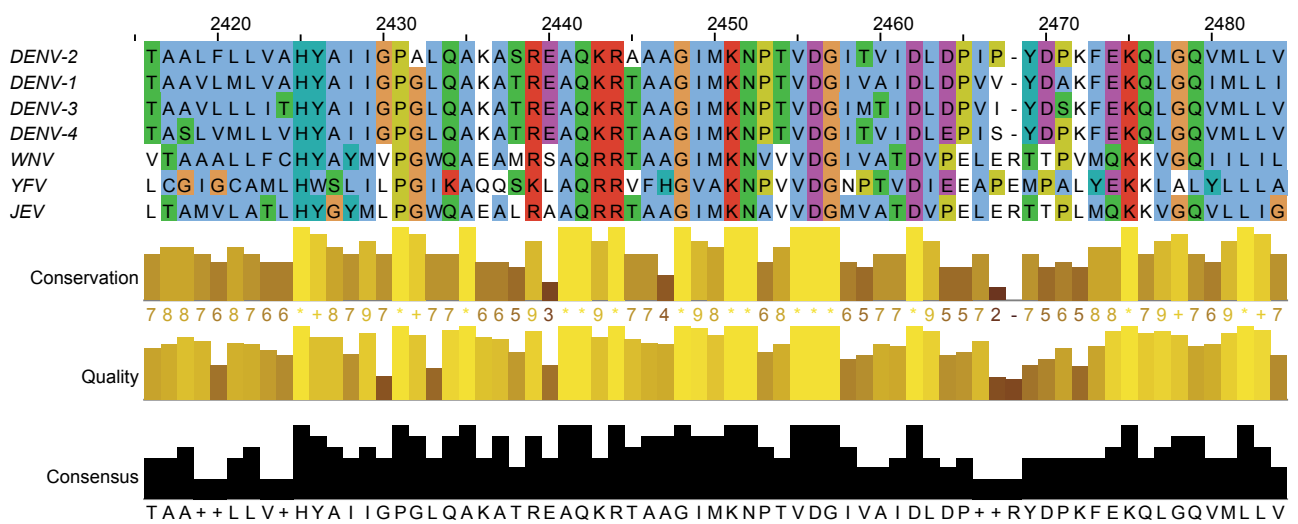

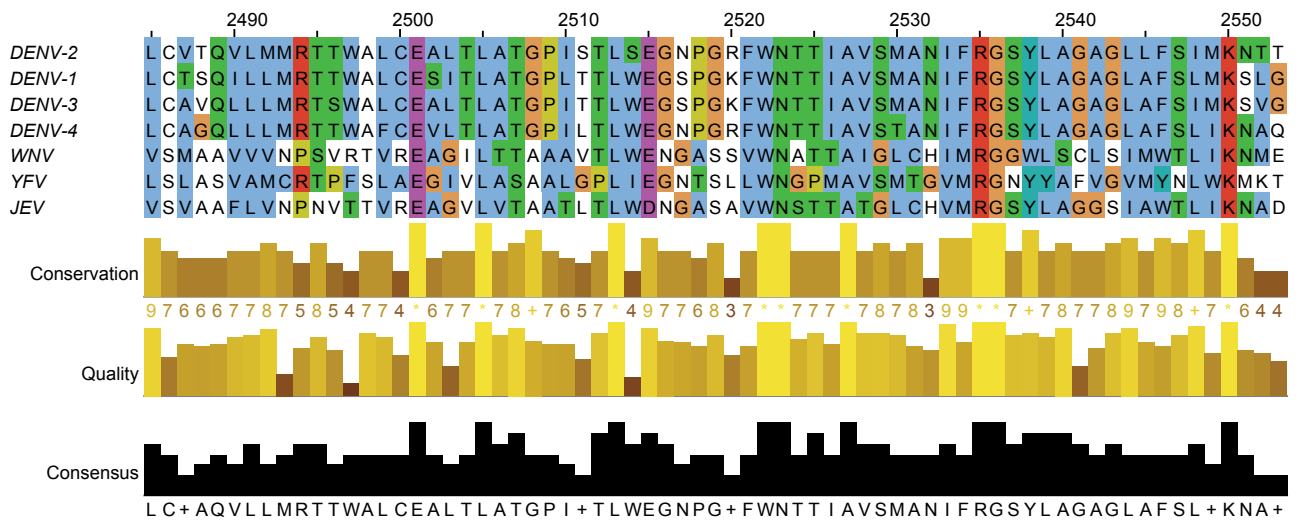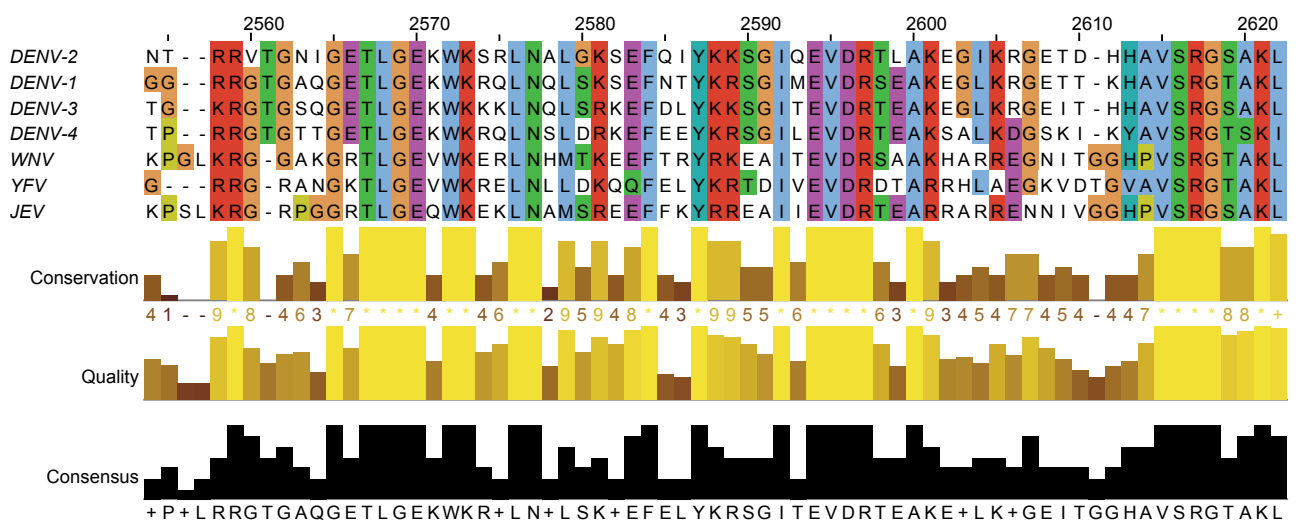

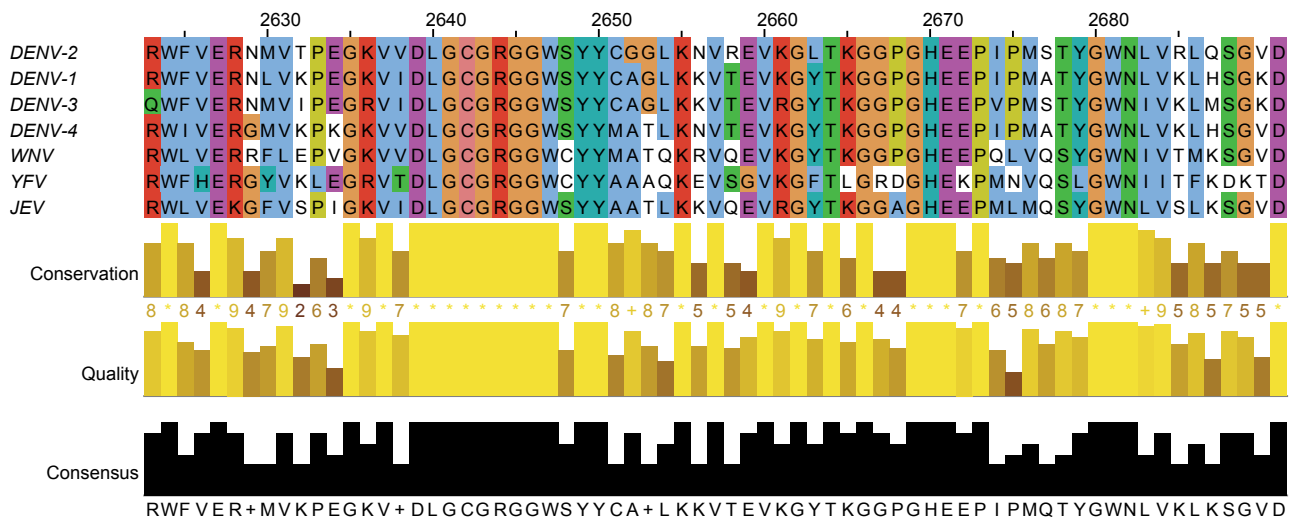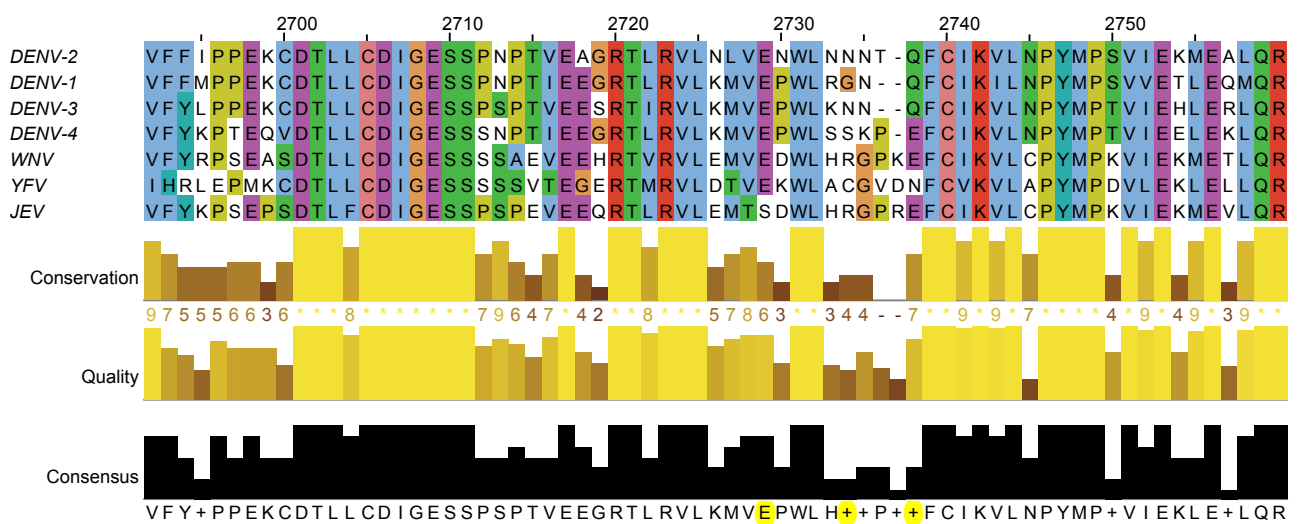

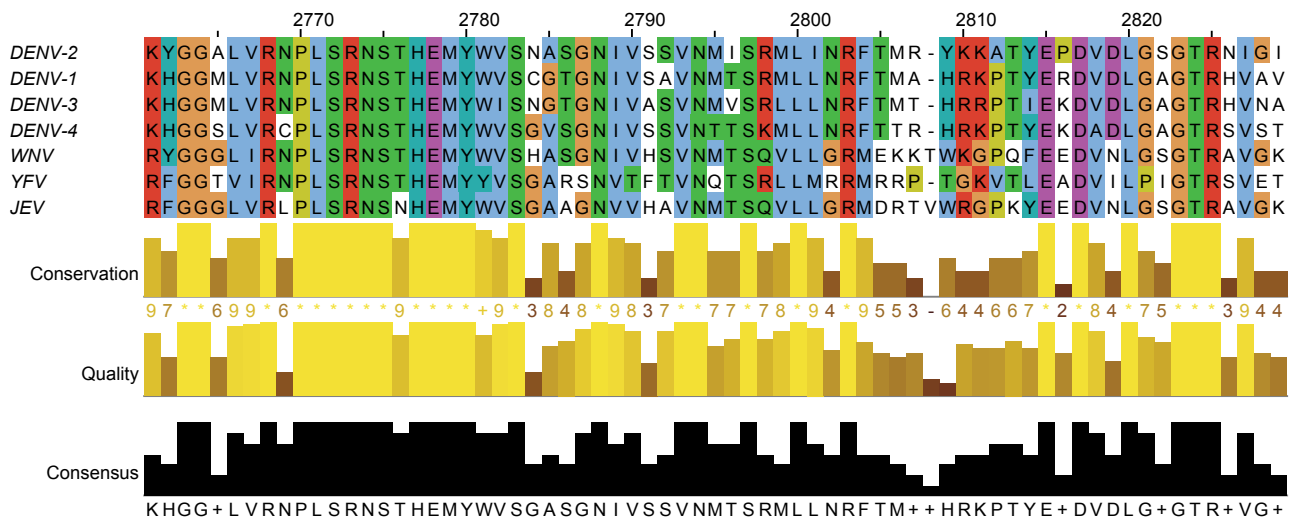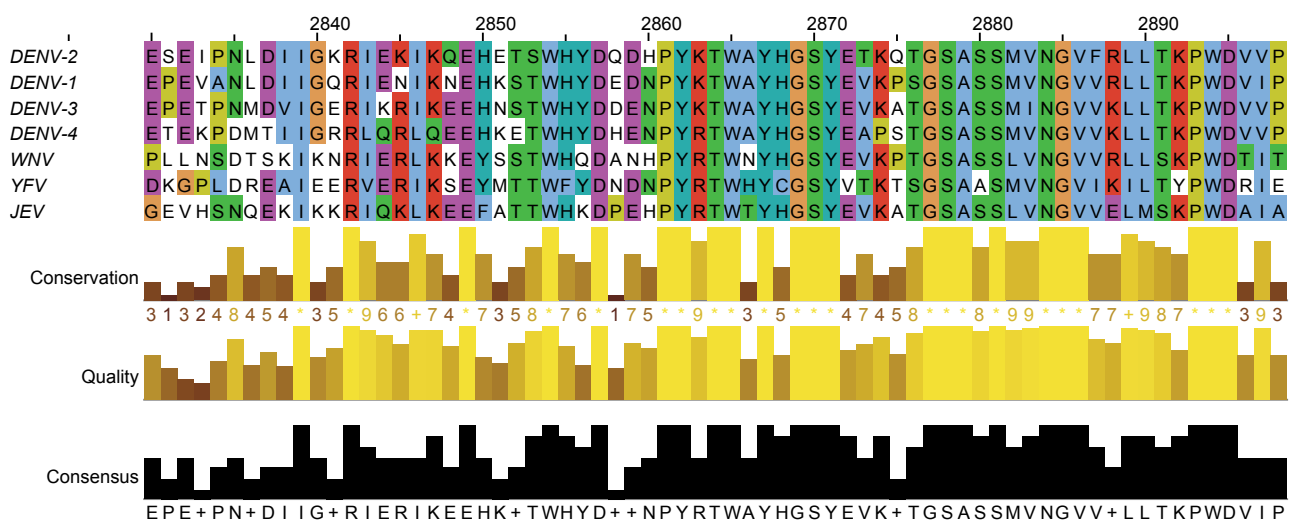

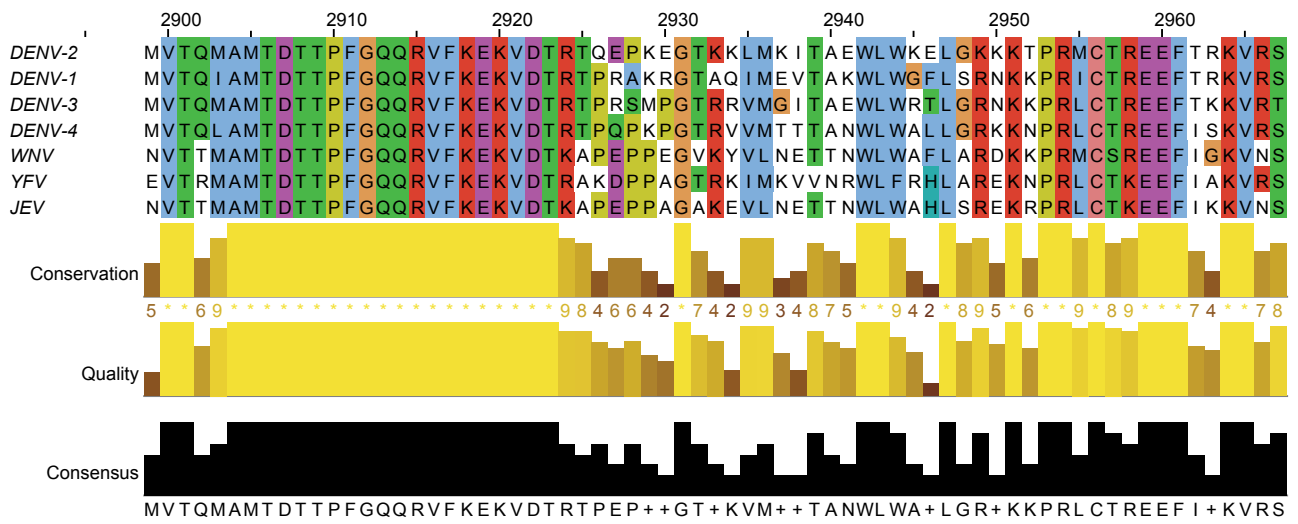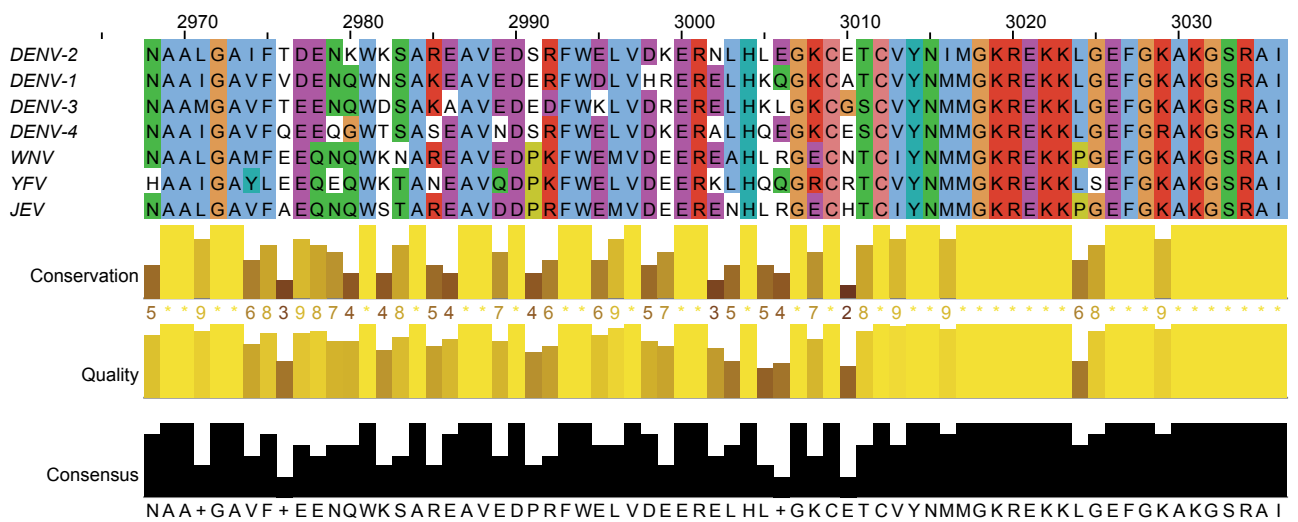



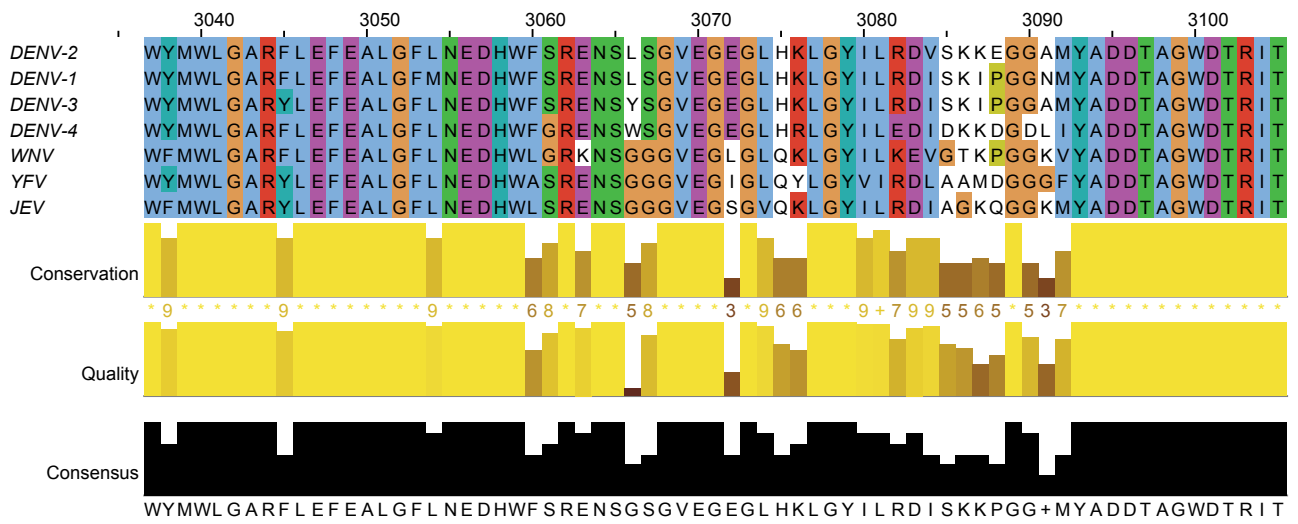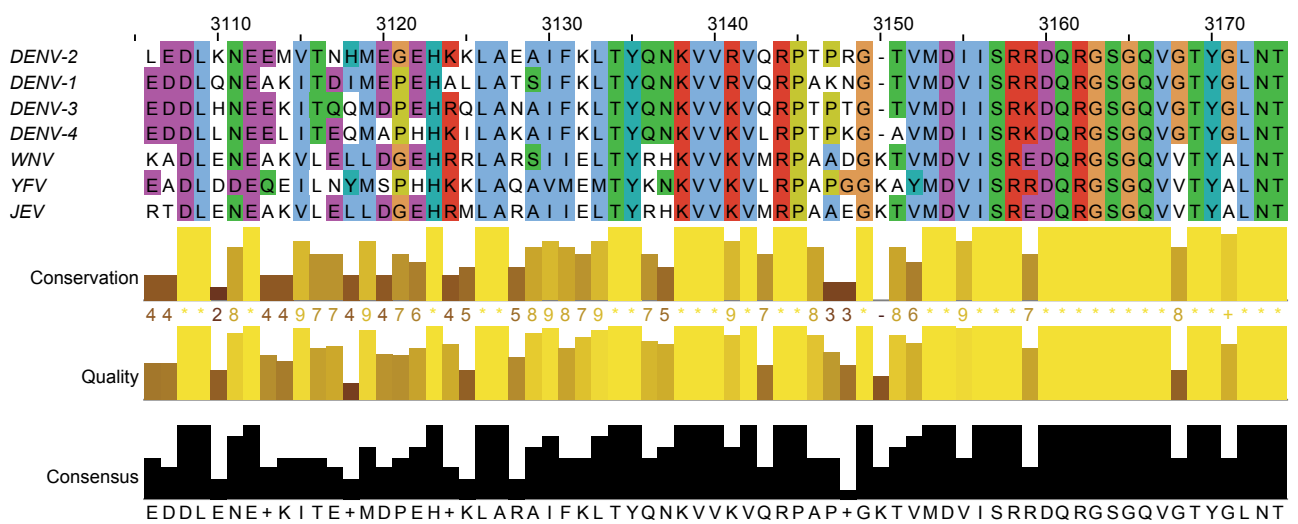

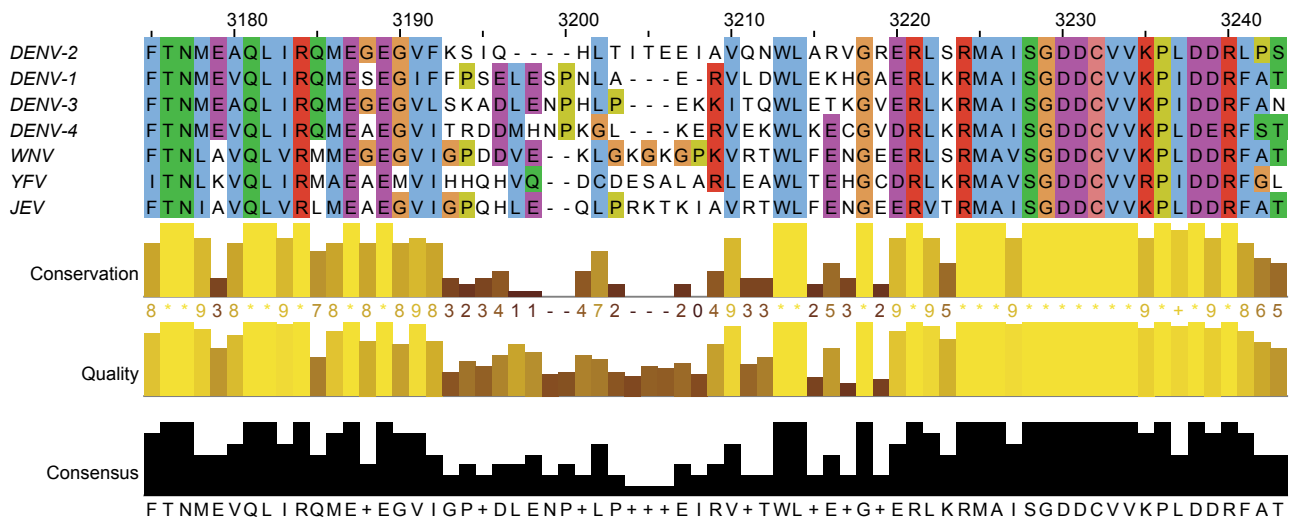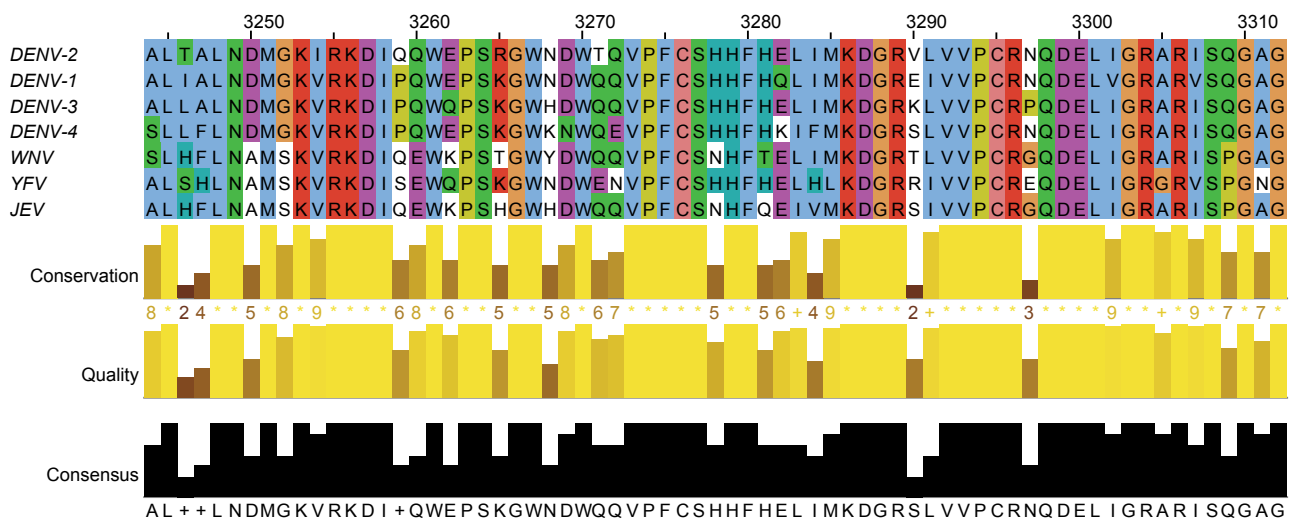

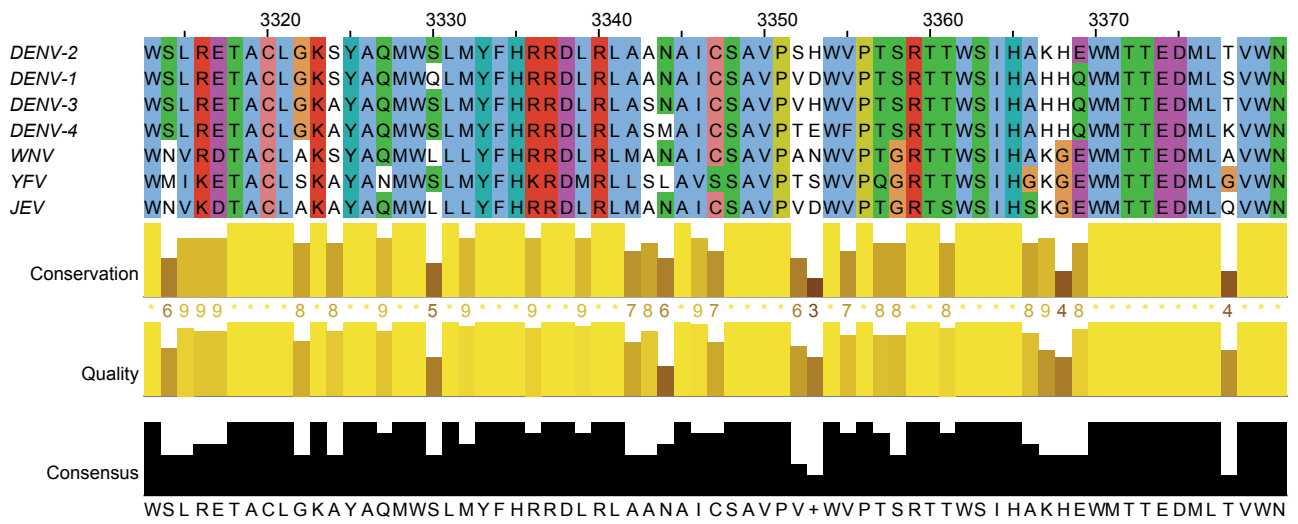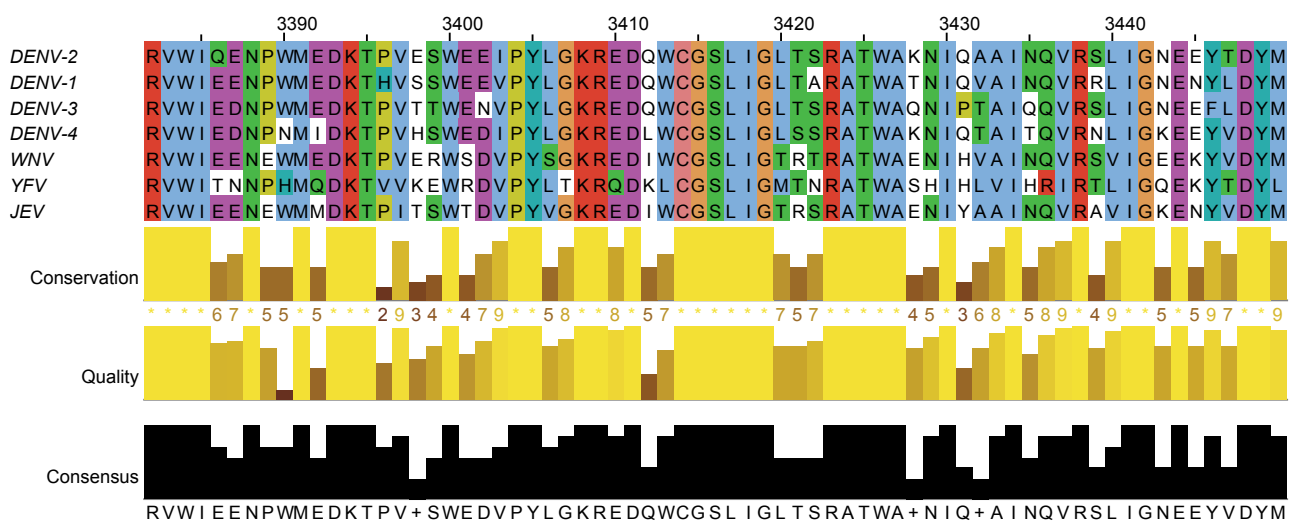

3460

|               |   |   |   |   |   |   |   |   |   |   |   |   |   |   |   |   |   |   |
|---------------|---|---|---|---|---|---|---|---|---|---|---|---|---|---|---|---|---|---|
| <i>DENV-2</i> | P | S | M | K | R | F | R | - | R | E | E | E | E | A | G | V | L | W |
| <i>DENV-1</i> | T | S | M | K | R | F | K | - | N | E | S | D | P | E | G | A | L | W |
| <i>DENV-3</i> | P | S | M | K | R | F | R | - | K | E | E | E | S | E | G | A | I | W |
| <i>DENV-4</i> | P | V | M | K | R | Y | S | - | A | H | F | E | S | E | G | V | L | - |
| <i>WNV</i>    | S | S | L | R | R | Y | E | - | D | T | I | V | V | E | D | T | V | L |
| <i>YFV</i>    | T | V | M | D | R | Y | S | V | D | A | D | L | Q | P | G | E | L | I |
| <i>JEV</i>    | T | S | L | R | R | Y | E | - | D | V | L | I | Q | E | D | R | V | I |

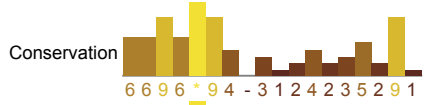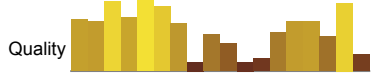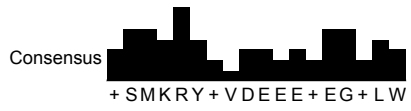

Supplement: JVI.01455-17_zjv023173144s1.pdf [file JVI.01455-17_zjv023173144s1.pdf]
